# Supplementary material for: Association of Lipoprotein and Thyroid Hormones With Cognitive Dysfunction in Patients With Systemic Lupus Erythematosus
Source: Research Square preprint supplement (doi:10.21203/rs.3.rs-115002/v1), 2020-12-07
Supplement: Supplementary file 2 [file cf6723fdde10c3486bc63382.docx]

**Supplementary Figure 1 Correlation analysis between cognitive function and IgG**


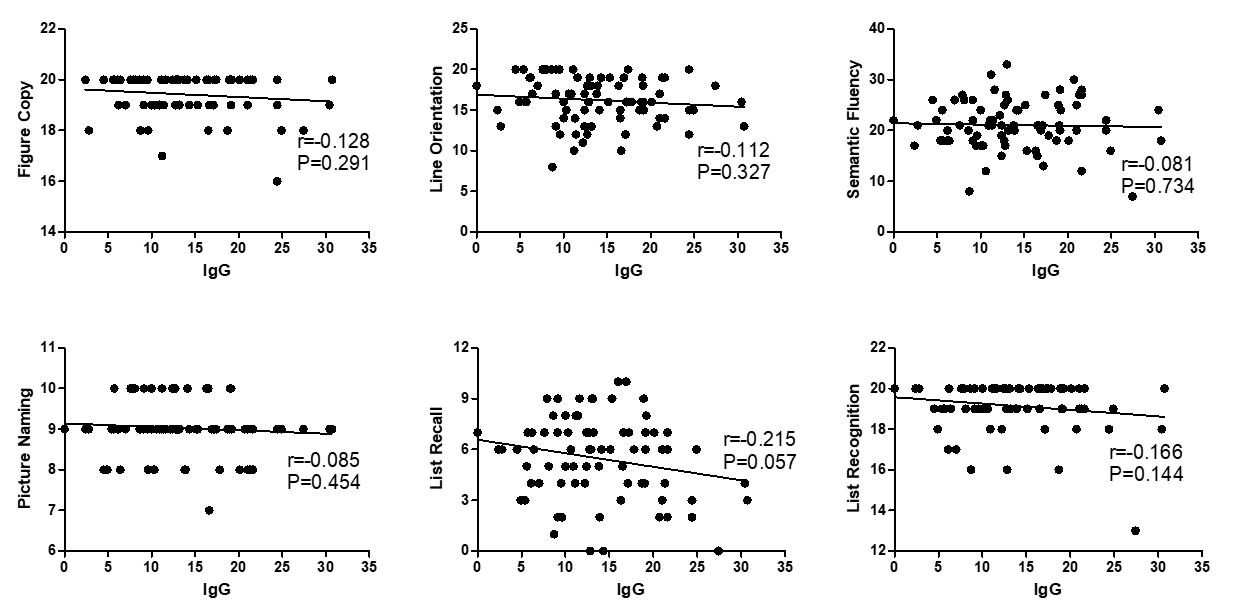


**Supplementary Figure 1.** Correlation between IgG and Figure Copy, Line Orientation, Semantic Fluency, Picture Naming, List Recall, and List Recognition in patients with SLE.

**Supplementary Figure 2 Correlation analysis between cognitive function and IgM**


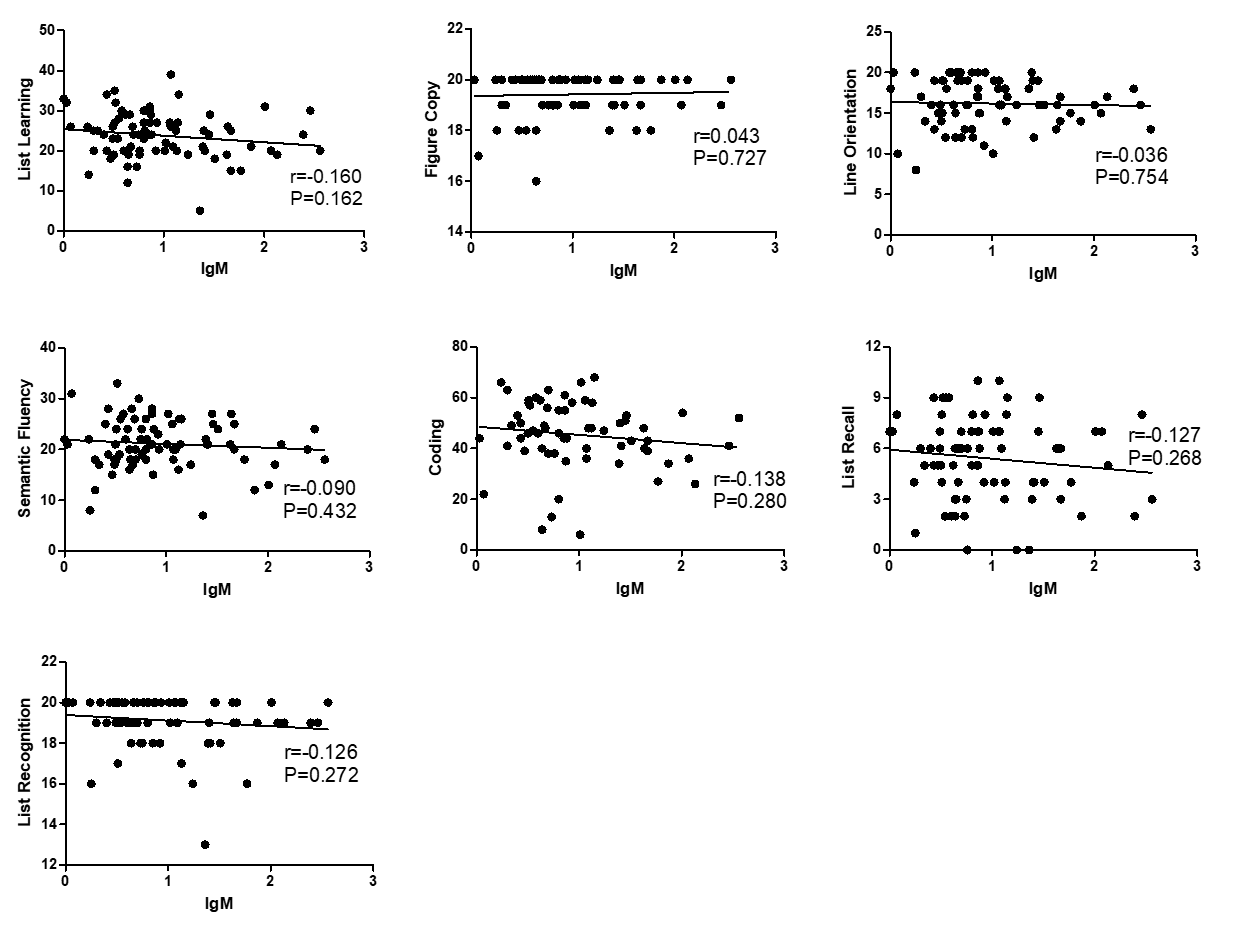


**Supplementary Figure 2.** Correlation between IgM and List Learning, Figure Copy, Line Orientation, Semantic Fluency, Coding, List Recall, and List Recognition in patients with SLE.

**Supplementary Figure 3 Correlation analysis between cognitive function and dsDNA**


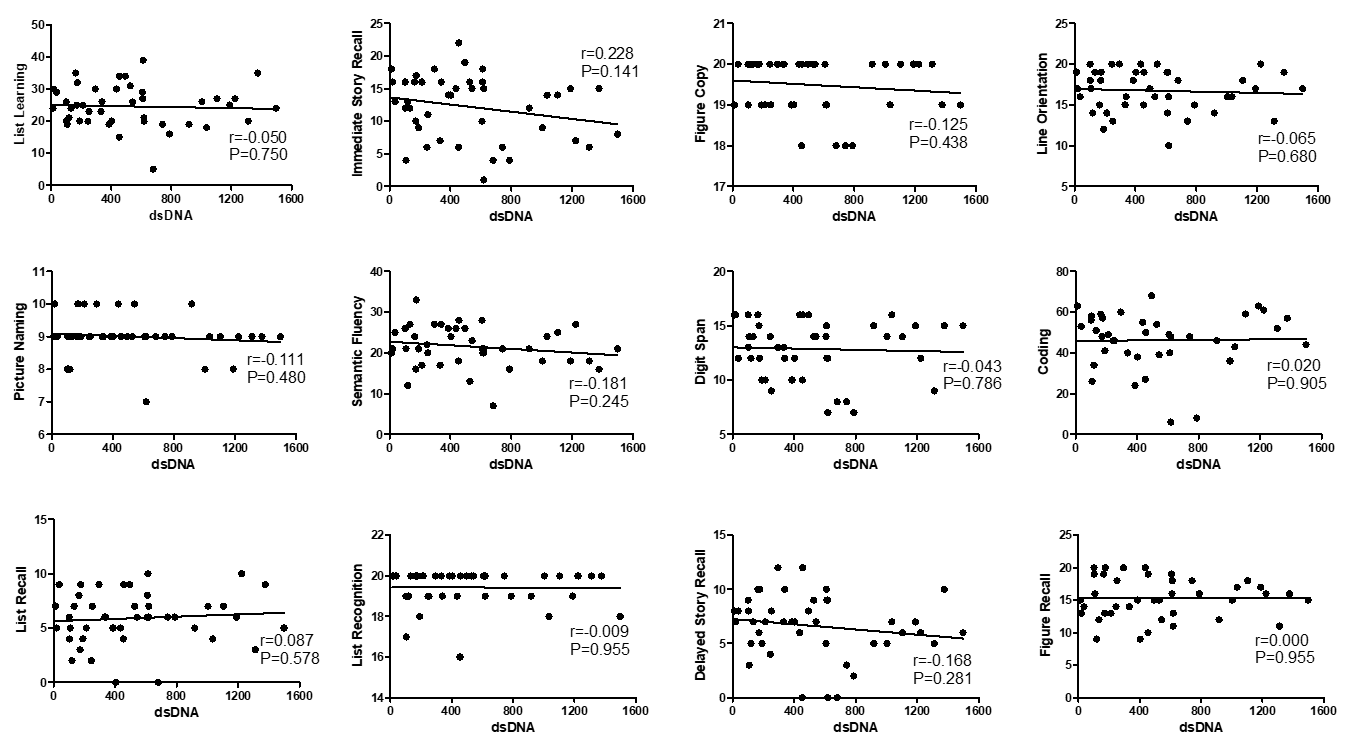


**Supplementary Figure 3.** Correlation between dsDNA and List learning, Immediate Story Recall, Figure Copy, Line Orientation, Picture Naming, Semantic Fluency, Digit Span, Coding, List Recall, List Recognition, Delayed Story Recall, and Figure Recall in patients with SLE.

**Supplementary Figure 4 Correlation analysis between cognitive function and IgG**


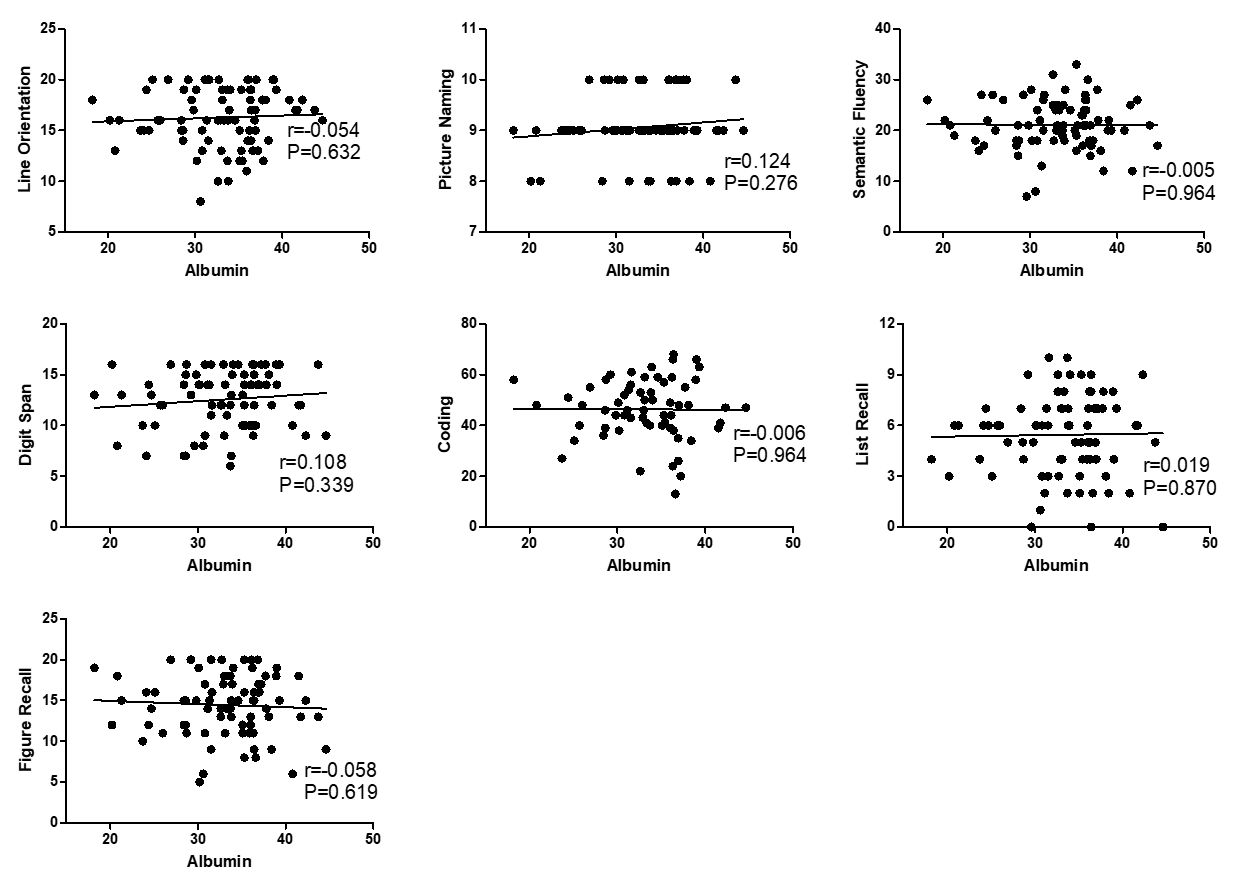


**Supplementary Figure 4.** Correlation between albumin and Line Orientation, Picture Naming, Semantic Fluency, Digit Span, Coding, List Recall, and Figure Recall in patients with SLE.

**Supplementary Figure 5 Correlation analysis between cognitive function and T3, T4**


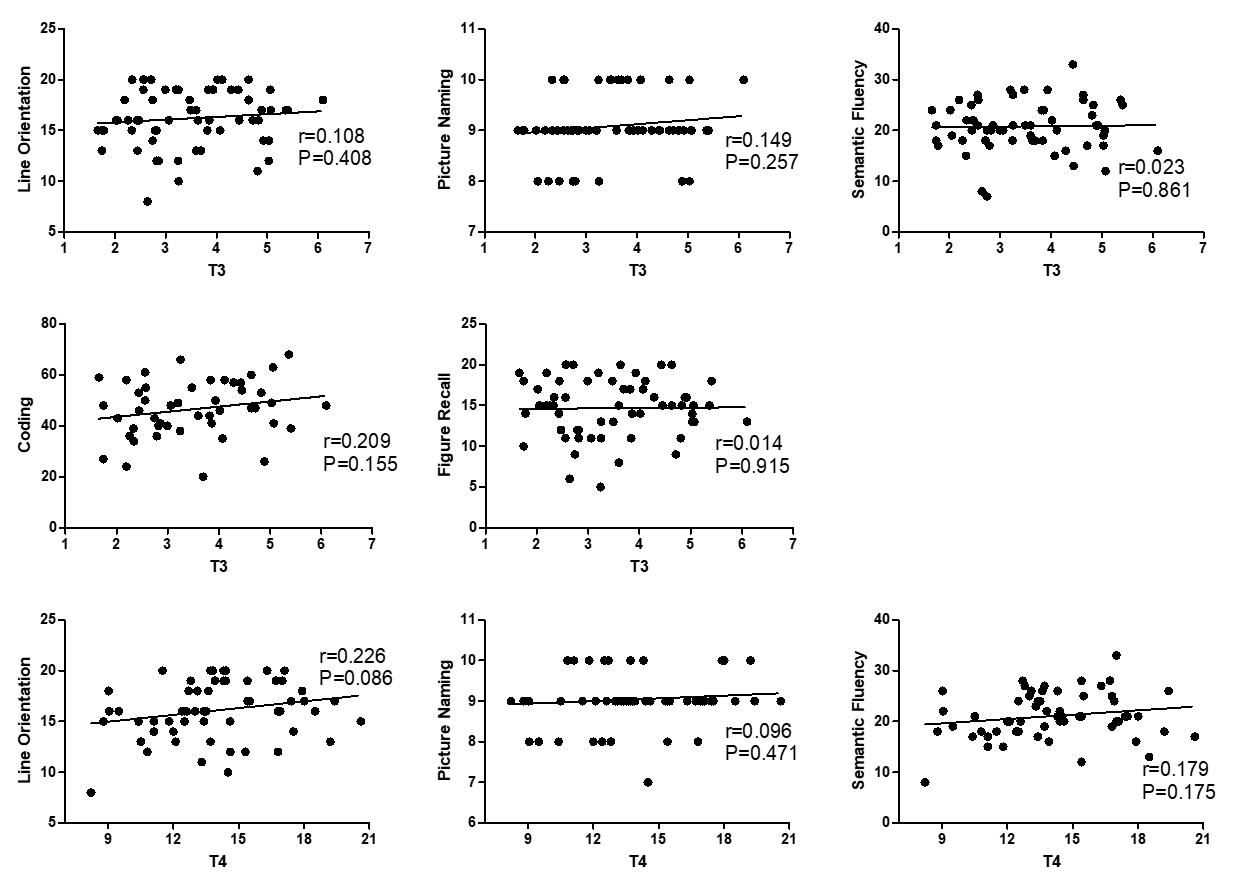


**Supplementary Figure 5.** Correlation between T3 and Line Orientation, Picture Naming, Semantic Fluency, Coding, and Figure Recall in patients with SLE.

Correlation between T4 and Line Orientation, Picture Naming and Semantic Fluency in patients with SLE.
